# Supplementary material for: Characteristics of surface energy balance and atmospheric circulation during hot-and-polluted episodes and their synergistic relationships with urban heat islands over the Pearl River Delta region
Source: Copernicus journal article supplement (doi:10.5194/acp-21-13443-2021), 2021-09-10
Supplement: Supplementary file 1 [file acp-21-13443-2021-supplement.pdf]

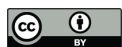

*Supplement of*

**Characteristics of surface energy balance and atmospheric circulation during hot-and-polluted episodes and their synergistic relationships with urban heat islands over the Pearl River Delta region**

**Ifeanyichukwu C. Nduka et al.**

*Correspondence to:* Steve Hung Lam Yim ([yimsteve@gmail.com](mailto:yimsteve@gmail.com))

The copyright of individual parts of the supplement might differ from the article licence.

## **1 Introduction**

The texts, figures and tables provide additional information that will help in our understanding of the model configuration, model evaluation and HPE identification and characterization.

### **30 1.1 Details of WRF model configurations**

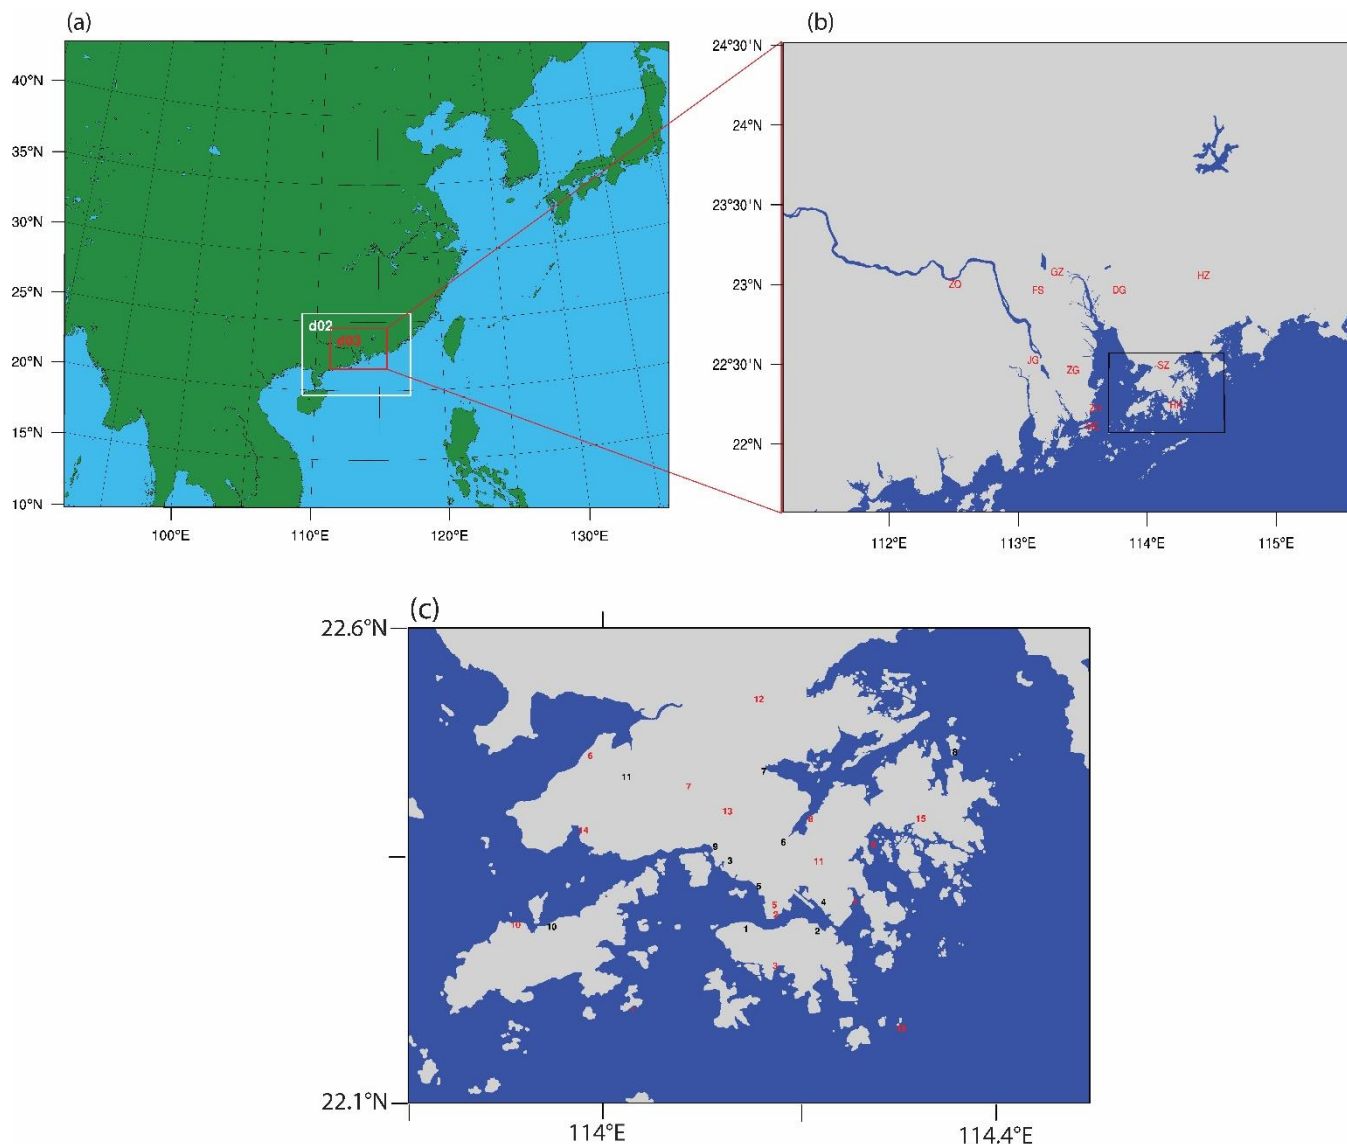

**Figure S1.** (a) WRF-Chem simulation domains. Downscaling was performed from D1 (27 km), D2 (9 km), and then D3 (3 km). (b) The study area and the location of all the cities in the study area (GZ – Guangzhou, SZ – Shenzhen, FS - Foshan, DG - Dongguan, ZG - Zhongshan, ZH - Zhuhai, HZ - Huizhou, JG - Jiangmen, ZQ – Zhaoqing, HK - Hong Kong, MC - Macau). The black box shows the Hong Kong area where the observation stations are located. (c) The air quality stations are numbered in black, while the meteorology stations are numbered in red). More information about the stations is presented in section 2.

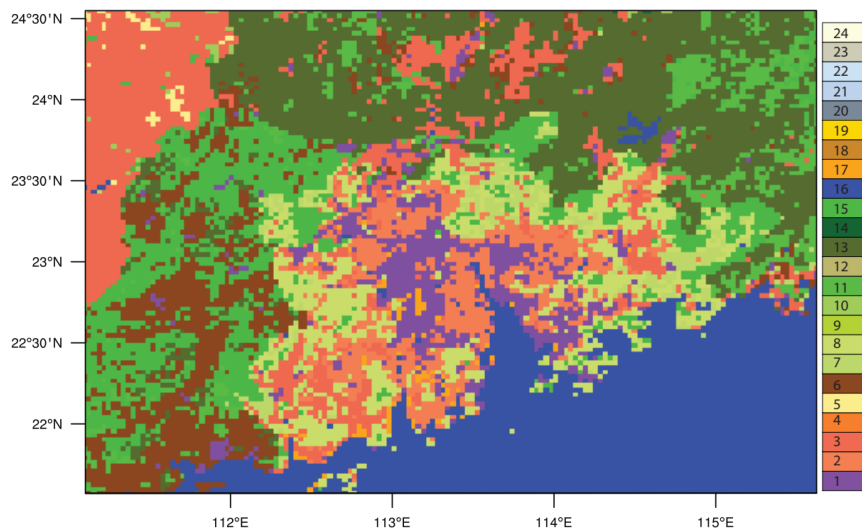

**Figure S2.** WRF Domain 3 USGS LULC configuration. USGS categorizations are named as follows: 1 Urban and Built-Up; 2 Dryland, Cropland, and Pasture; 3 Irrigated Cropland and Pasture; 4 Mixed Cropland and Pasture; 5 Cropland/Grassland Mosaic; 6 Cropland/Woodland Mosaic; 7 Grassland; 8 Shrubland; 9 Mixed Shrubland/Grassland; 10 Savanna; 11 Deciduous Broadleaf; 12 Deciduous Needleleaf; 13 Evergreen Broadleaf; 14 Evergreen Needleleaf; 15 Mixed Forest; 16 Water Bodies; 17 Herbaceous Wetland; 18 Wooded Wetland; 19 Barren/Sparsely Vegetated; 20 Herbaceous Tundra; 21 Wooded Tundra; 22 Mixed Tundra; 23 Bare Ground Tundra; 24 Snow or Ice.

**Table S1.** Details for the WRF configurations used in this study.

| Configurations           | Physics scheme options          |
|--------------------------|---------------------------------|
| Microphysics             | Morrison 2-Moment Scheme        |
| Longwave Radiation       | RRTMG Longwave Scheme           |
| Shortwave Radiation      | RRTMG shortwave Scheme          |
| Surface Layer            | MM5 Similarity Scheme           |
| Land Surface             | Unified Noah Land Surface Model |
| Planetary Boundary Layer | YSU                             |
| Cumulus                  | Grell 3D Scheme                 |

In the innermost model domain (Figure S1a), the urban areas were also found to aggregate toward each other and comprised 11 cities located in the PRD region (Figure S1b: Guangzhou, Shenzhen, Foshan, Dongguan, Zhongshan, Zhuhai, Huizhou, Jiangmen, Zhaoqing, Hong Kong, and Macau. Table S1 shows the physics schemes used in the model simulations. The chemical mechanism option was set as CB05 and a MADE/SORGAM\_aq aerosol model was used. The USGS land use/land cover categorization from WRF was used to delineate between urban/built-up and vegetated areas. The urban and built-up category was used to represent urban surfaces and the vegetated category represented all other surfaces besides urban and

water categories (Figure S2). The data shows that about 15% and 70% of the domain was designated as built-up and vegetated land use, respectively.

## 2 Model Evaluation

### 2.1 Evaluation method

The results from the baseline model simulations were compared with observations from stations within the PRD region (Figure S1b; 16 stations for meteorology and 11 for air quality). Metrics used to validate the performance of the model included correlation coefficients ( $r$ ), mean bias (MB), root mean squared error (RMSE), and Index of Agreement (IoA), the mathematical expressions for which are

$$r = \frac{\sum_{i=1}^N (M_i - \bar{M}) \cdot (O_i - \bar{O})}{\sqrt{\sum_{i=1}^N (M_i - \bar{M})^2} \cdot \sqrt{\sum_{i=1}^N (O_i - \bar{O})^2}} \tag{1}$$

$$MB = \frac{1}{N} \sum_{i=1}^N (M_i - O_i) \tag{2}$$

$$RMSE = \sqrt{\frac{1}{N} \sum_{i=1}^N (M_i - O_i)^2} \tag{3}$$

$$IOA = 1 - \frac{\sum (M_i - O_i)^2}{\sum (|M_i - \bar{O}| + |O_i - \bar{O}|)^2} \tag{4}$$

where  $M_i$  and  $O_i$  are values of the model and observation results at hour  $i$ , respectively;  $N$  is the number of samples (hours) for each time and location; and  $\bar{M}$  and  $\bar{O}$  are model and observation means, respectively.

### 2.2 Model performance

**Table S2a.** Model evaluation for mean air temperature at 2 m ( $T_2$ ), wind speed at 10 m ( $WS_{10}$ ), and relative humidity at 2 m ( $RH_2$ ) for all eight HPEs and 16 stations. RMSE, root mean square error, MB, mean bias.

| Statistical Variables   | $T_2$ (°C) | $WS_{10}$ (m/s) | $RH_2$ (%) |
|-------------------------|------------|-----------------|------------|
| Model Mean              | 28.31      | 4.23            | 75.67      |
| Observation Mean        | 28.08      | 3.40            | 76.57      |
| Correlation Coefficient | 0.70       | 0.33            | 0.64       |
| RMSE                    | 1.94       | 2.67            | 10.25      |
| MB                      | 0.25       | 0.86            | -1.07      |

Table S2 shows the results for model evaluation. The simulated means of all the variables were consistent with the observed means. Strong correlations were found between model results and observations for T<sub>2</sub> and RH<sub>2</sub> with correlation coefficients of 0.70 and 0.64, respectively. The MB and RMSE for T<sub>2</sub> were 0.25°C and 1.94°C, respectively. For RH<sub>2</sub>, MB and RMSE were -1.07% and 10.25%, respectively. The correlation coefficient for wind speed was approximately 0.33, whereas the MB and RMSE were 0.86 and 2.67 m/s, respectively. These results indicate an overestimation of surface wind speeds in the WRF model, which is reported to be a common problem in regional meteorological modelling (Fan et al., 2011). A possible reason for this is that the observations represent wind speed at one local point, whereas the results for the model represent an average quantity over a model grid. The T<sub>2</sub> and RH results indicate good agreement between the simulated results and the observations. Overall, the evaluation results show that the WRF model was sufficiently robust for this study.

**Table S2b.** Model evaluation for mean PM<sub>2.5</sub>, PM<sub>10</sub>, Ozone (O<sub>3</sub>), Nitrogen di oxide (NO<sub>2</sub>), and Sulfur di oxide (SO<sub>2</sub>) for all eight HPEs and 11 stations. RSME, root square mean error, mean bias; Model mean; Observation (Obs) Mean; Index of Agreement.

| Statistical Variables | PM <sub>2.5</sub> | PM <sub>10</sub> | O <sub>3</sub> | NO <sub>2</sub> | SO <sub>2</sub> |
|-----------------------|-------------------|------------------|----------------|-----------------|-----------------|
| Model mean            | 15.5              | 28.0             | 37.3           | 37.4            | 15.5            |
| Obs Mean              | 32.0              | 44.3             | 46.5           | 50.5            | 14.6            |
| Index of Agreement    | 0.5               | 0.5              | 0.6            | 0.6             | 0.6             |
| RMSE                  | 23.8              | 27.5             | 46.7           | 31.3            | 15.3            |
| Mean Bias             | -17.6             | -16.3            | -4.8           | -8.1            | 0.9             |

The air quality evaluation was conducted for PM<sub>2.5</sub>, PM<sub>10</sub>, O<sub>3</sub>, NO<sub>2</sub> and SO<sub>2</sub>. The mean result from the 11 stations and 8 HPEs studied shows that the index of agreement was 0.5 and 0.6 for the particulates and gaseous, respectively. The mean bias for the particulates were -17.6 µg/m<sup>3</sup> (PM<sub>2.5</sub>) and -16.3 µg/m<sup>3</sup> (PM<sub>10</sub>), while the gases were -4.8 µg/m<sup>3</sup> (O<sub>3</sub>), -8.1 µg/m<sup>3</sup> (NO<sub>2</sub>) and 0.9 µg/m<sup>3</sup> (SO<sub>2</sub>). The underestimation observed for the particulates can be attributed to the overestimation of wind speed which can result in increased dispersion and lowering of concentrations.

95

100

3 Identified HPEs

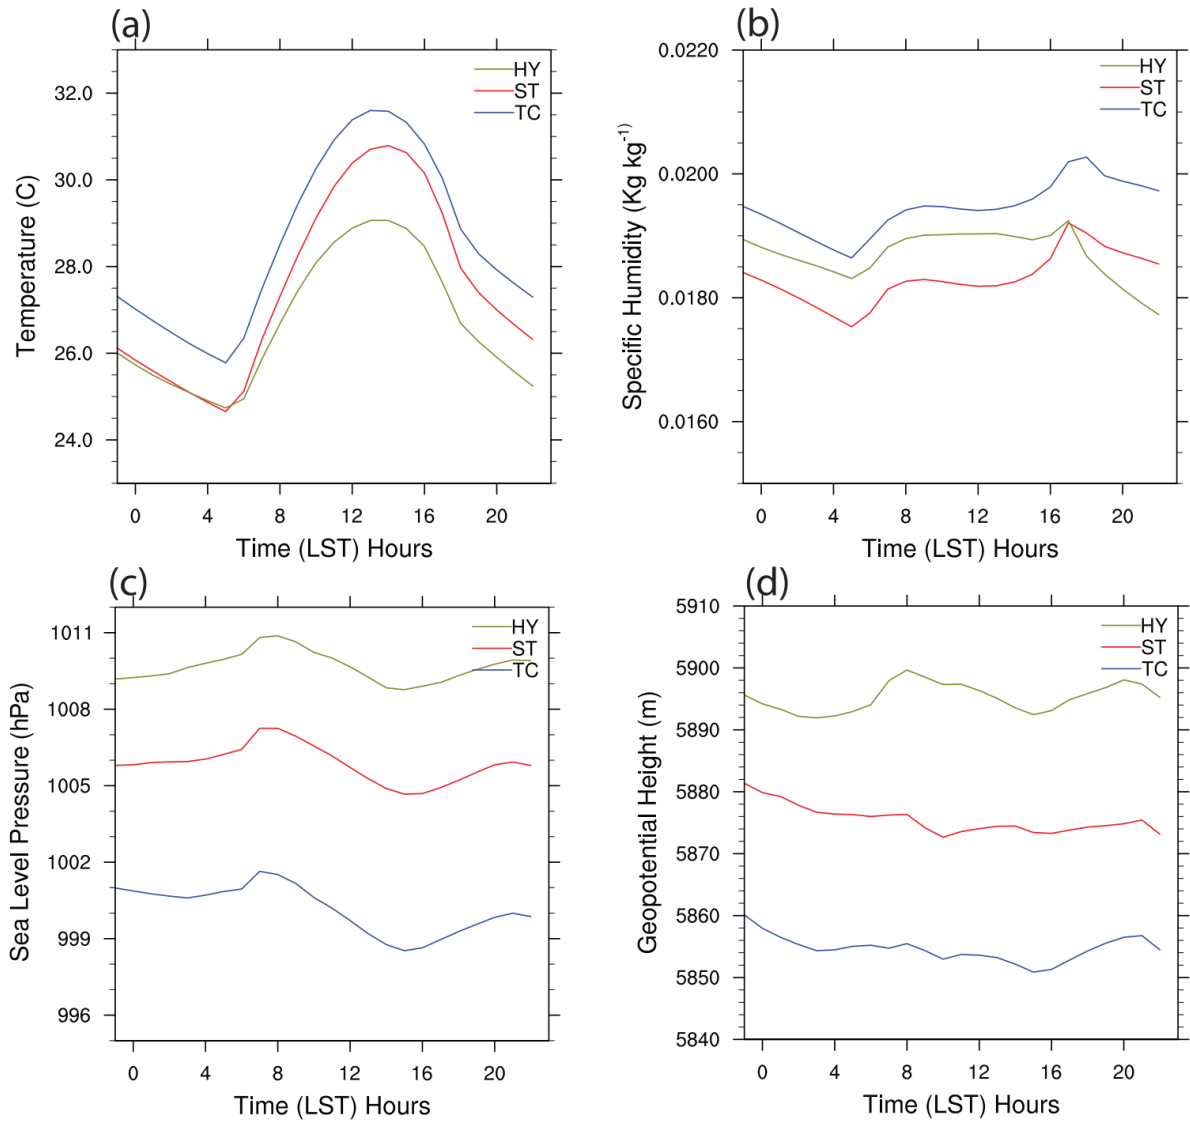

**Figure S3.** (a) Air temperature at 2 m ( $T_2$ ). (b) Specific humidity. (c) Sea level pressure. (d) Geopotential Height. Diurnal means are for the three clusters for TC (blue lines), ST (red lines), and HY (brown lines) group.

110 The results of the cluster analysis indicate that eight HPEs can be classified based on their formation and characteristics: Tropical Cyclone (TC-HPE); Stagnant (ST-HPE); and Hybrid (HY-HPE). Figure S3 showed the diurnal means of  $T_2$ , specific humidity, Sea Level Pressure (SLP), and geopotential height of the three HPE groups. Particularly,  $T_2$  among the HPEs in each

group did not vary significantly, whereas remarkable differences were found in  $T_2$  among the three groups. The TC-HPE had the highest temperature (32 °C) during its peak period, followed closely by the peak of ST-HPE (31 °C) and HY-HPE (29 °C), which typically occurred at 14:00 local time. Among the three groups, TC-HPE had a relatively lower SLP (~999 hPa) and geopotential height (GPH, 5,855 m), whereas for ST-HPE and HY-HPE, these values were respectively approximately 1,005 hPa and 5,875 m and approximately 1,009 hPa and 5,895 m (Figure S3c-d).

120

4 Weather Charts of HPE group

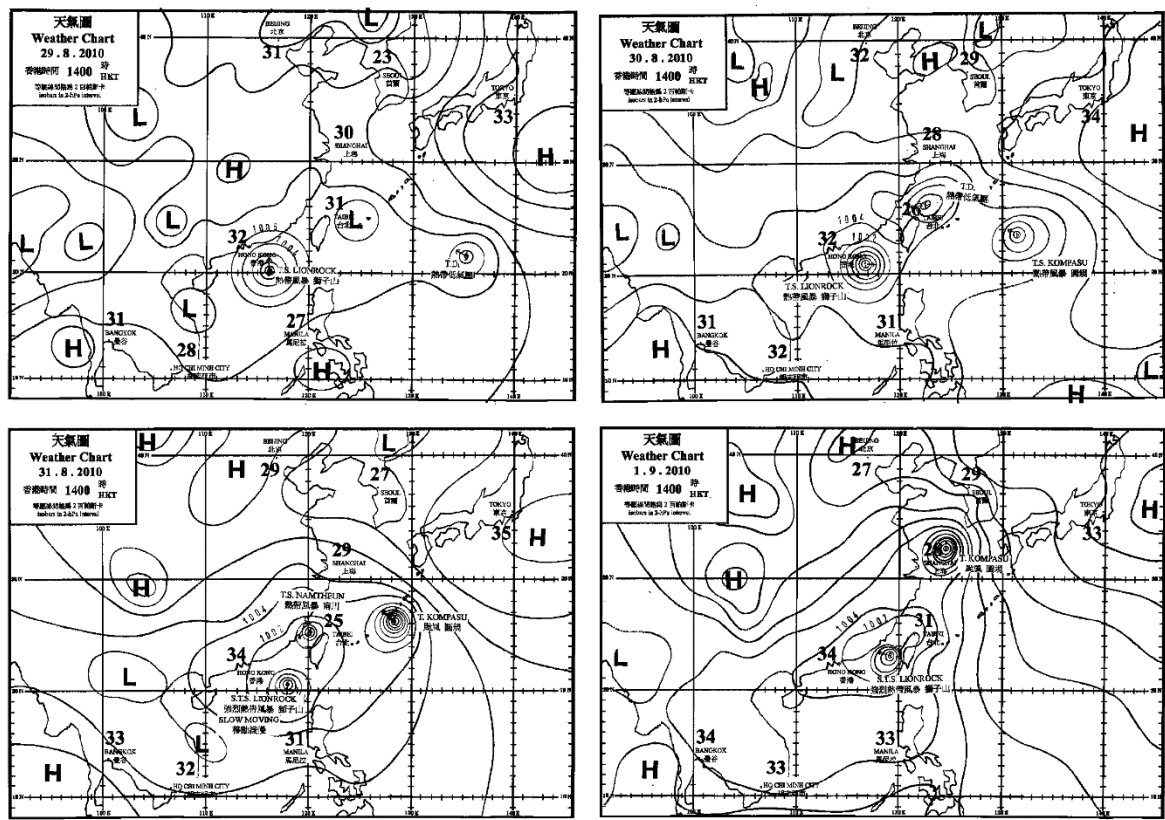

Figure S4: Tropical cyclone group Episode (20100829-0901) Shows the evolution of the temperature and pressure conditions during the TC-HPE. The weather charts were obtained from the Hong Kong Observatory web site (<https://www.hko.gov.hk/en/wxinfo/currwx/wxcht.htm>) on may. 2018.

125



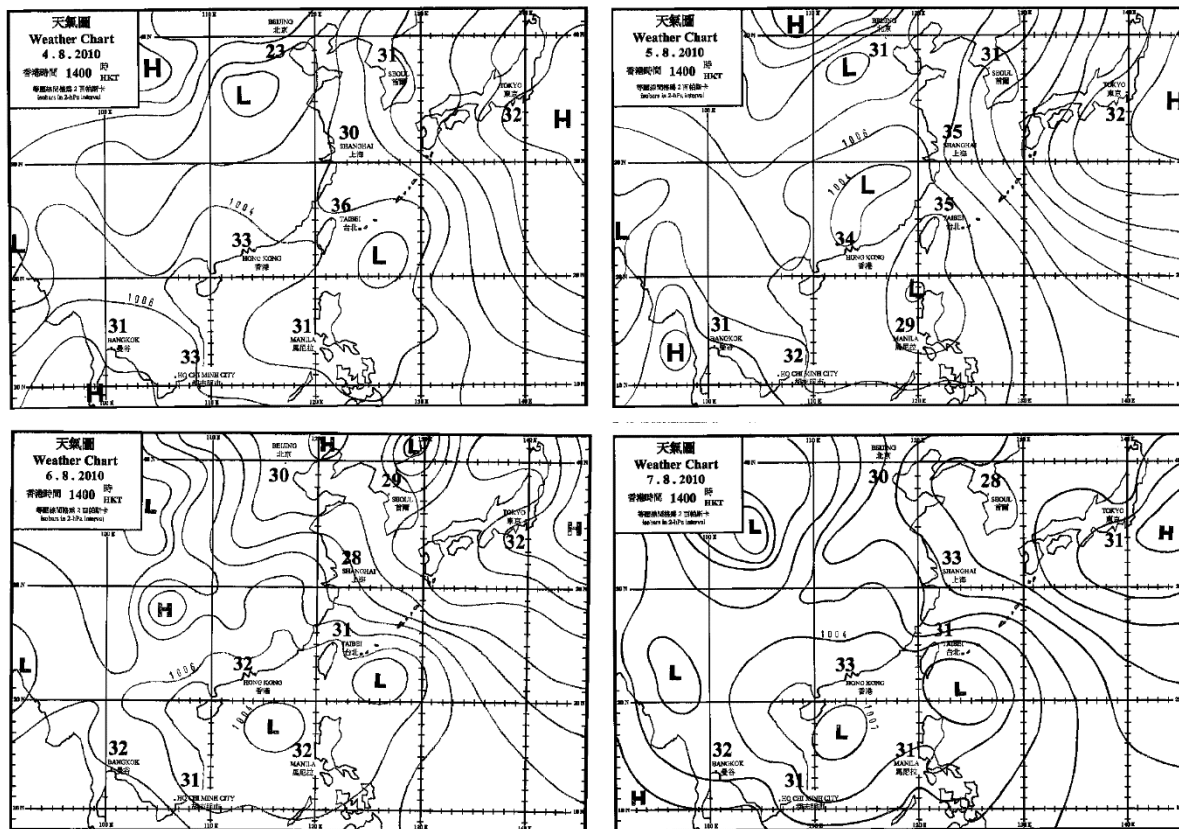

Figure S5: Stagnant group Episode (20100804-07) Shows the evolution of the temperature and pressure conditions during the 130 ST-HPE. The weather charts were obtained from the Hong Kong Observatory web site (<https://www.hko.gov.hk/en/wxinfo/currwx/wxcht.htm>) on may. 2018.

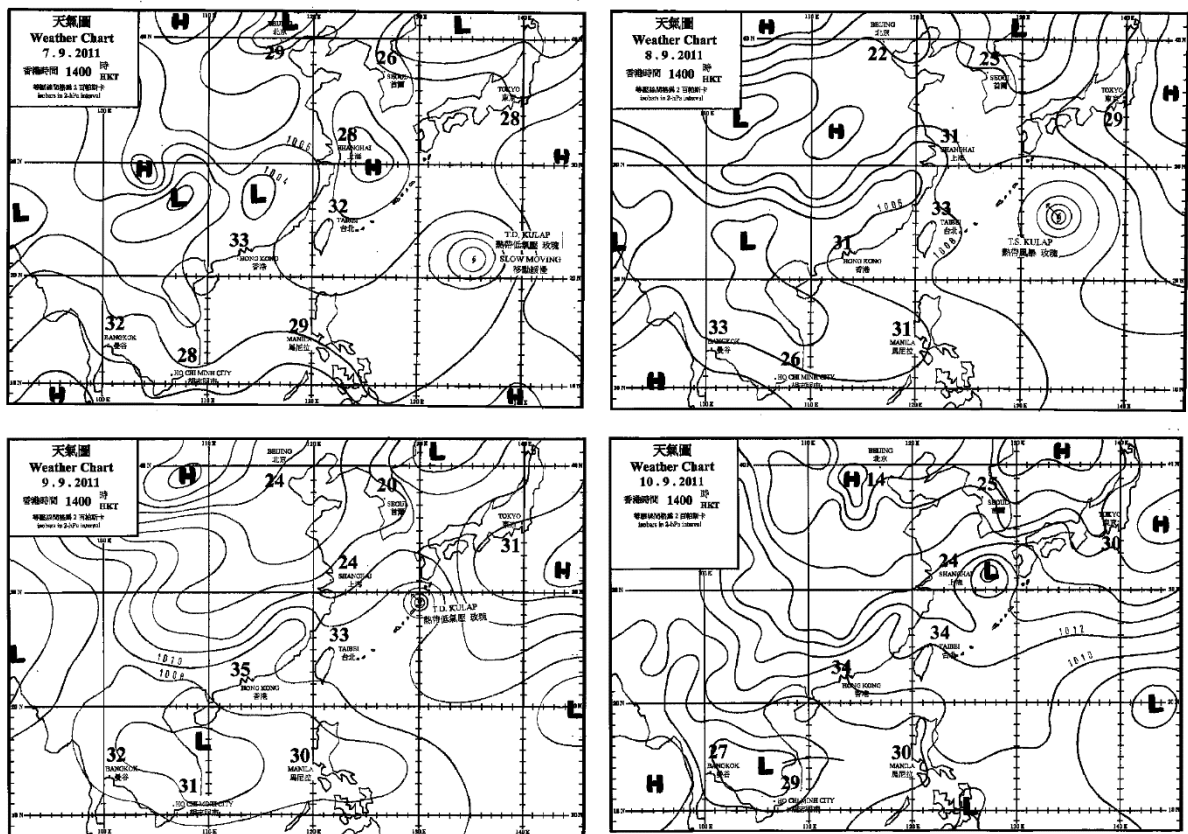

135 Figure S6. Hybrid group Episode (20110907-10) Shows the evolution of the temperature and pressure conditions during the HY-HPE. The weather charts were obtained from the Hong Kong Observatory web site (<https://www.hko.gov.hk/en/wxinfo/currwx/wxcht.htm>) on may. 2018.

5 Simulated Wind profiles for the HPE groups

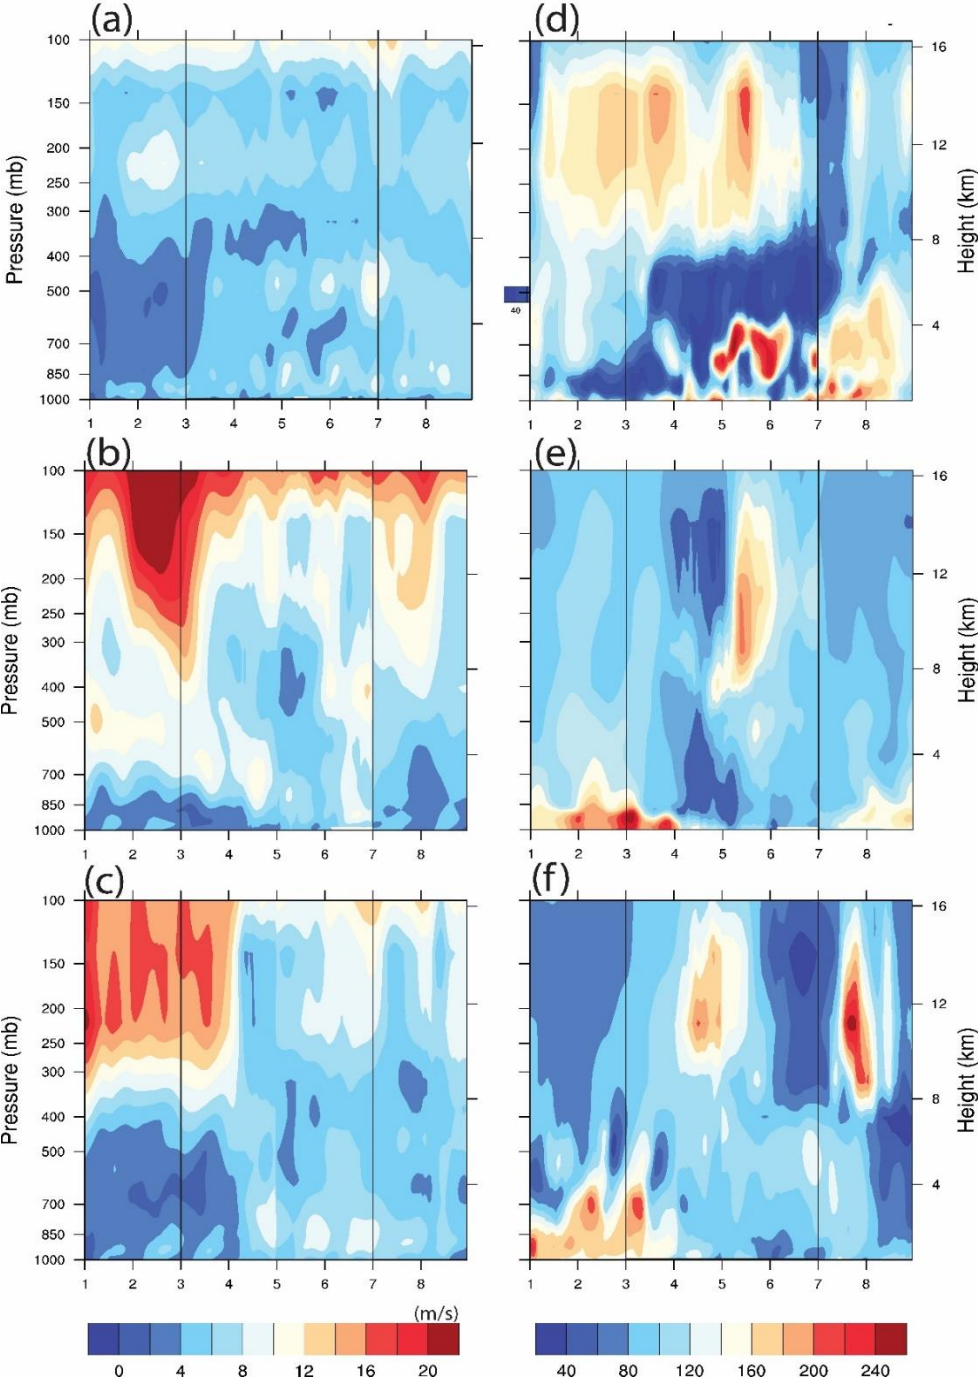

**Figure S7.** (a-c) Wind speed(m/s) for TC-HPE, ST-HPE and HY-HPE; (d-f) Wind direction for TC-HPE, ST-HPE and HY-HPE. Black boxes represent the period of HPEs.

## References

- 145 Chan, E. Y. Y., Goggins, W. B., Kim, J. J. and Griffiths, S. M.: A study of intracity variation of temperature-related mortality and socioeconomic status among the Chinese population in Hong Kong, *J Epidemiol Community Health*, 66(4), 322–327, doi:10.1136/jech.2008.085167, 2012.
- Fan, S. J., Fan, Q., Yu, W., Luo, X. Y., Wang, B. M., Song, L. L. and Leong, K. L.: Atmospheric boundary layer characteristics over the Pearl River Delta, China, during the summer of 2006: measurement and model results, *Atmospheric Chemistry and Physics*, 11(13), 6297–6310, doi:https://doi.org/10.5194/acp-11-6297-2011, 2011.
- 150 Wang, Y., Chan, A., Lau, G. N.-C., Li, Q., Yang, Y. and Yim, S. H. L.: Effects of urbanization and global climate change on regional climate in the Pearl River Delta and thermal comfort implications, *International Journal of Climatology*, 39(6), 2984–2997, doi:10.1002/joc.5996, 2019.
